# Supplementary material for: Brain Effects of SC-Nanophytosomes on a Rotenone-Induced Rat Model of Parkinson’s Disease—A Proof of Concept for a Mitochondria-Targeted Therapy
Source: MDPI journal article supplement (doi:10.3390/ijms232012699), 2022-10-21
Supplement: s1 [file s1]

# **Brain effects of SC-Nanophytosomes on a rotenone-induced rat model of Parkinson's disease – a proof of concept for a mitochondria-targeted therapy**

Daniela Mendes<sup>1</sup>, Francisco Peixoto<sup>2</sup>, Maria Manuel Oliveira<sup>3</sup>, Paula B. Andrade<sup>1</sup> and Romeu A. Videira<sup>1, \*</sup>

<sup>1</sup> *REQUIMTE/LAQV*, Laboratory of Pharmacognosy, Department of Chemistry, Faculty of Pharmacy, University of Porto, Rua de Jorge Viterbo Ferreira, nº 228, Porto 4050-313, Portugal.

<sup>2</sup> *Chemistry Center – Vila Real (CQ-VR)*, Biological and Environment Department, School of Life and Environmental Sciences, University of Trás-os-Montes e Alto Douro, UTAD, P.O. Box 1013; 5001-801 Vila Real, Portugal.

<sup>3</sup> *Chemistry Center – Vila Real (CQ-VR)*, Chemistry Department, School of Life and Environmental Sciences, University of Trás-os-Montes e Alto Douro, UTAD, P.O. Box 1013; 5001-801 Vila Real, Portugal.

\*Corresponding author: [rvideira@ff.up.pt](mailto:rvideira@ff.up.pt)

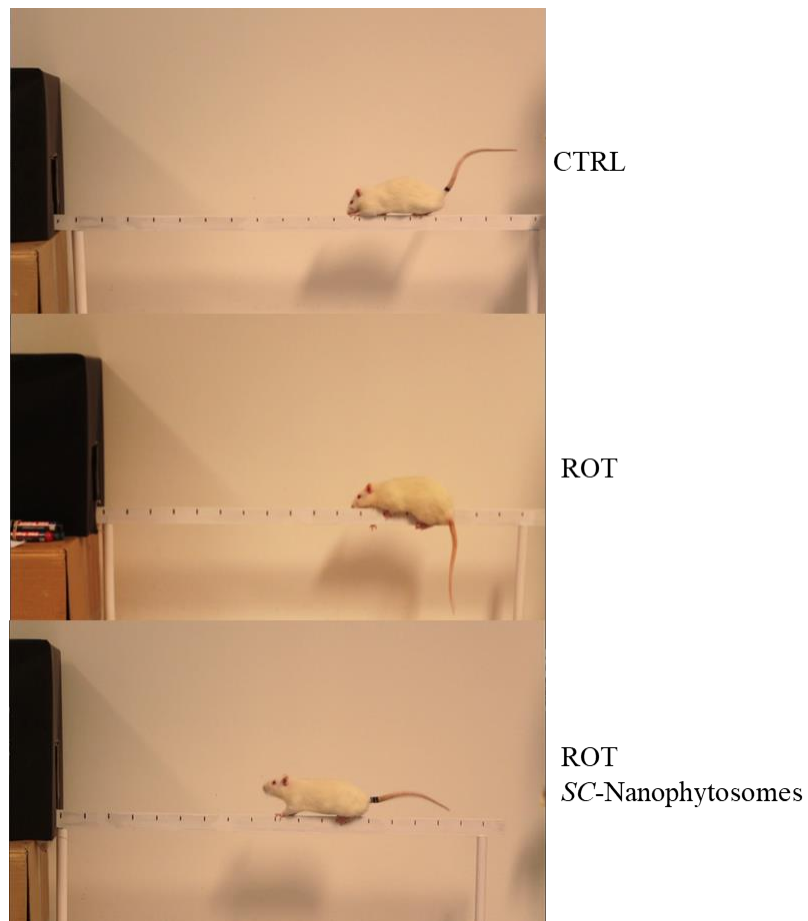

**Figure S1.** Captions obtained from the video camera records during the beam walking test for the three groups of the experimental plan: CTRL, ROT and ROT+SC-Nanophytosomes.

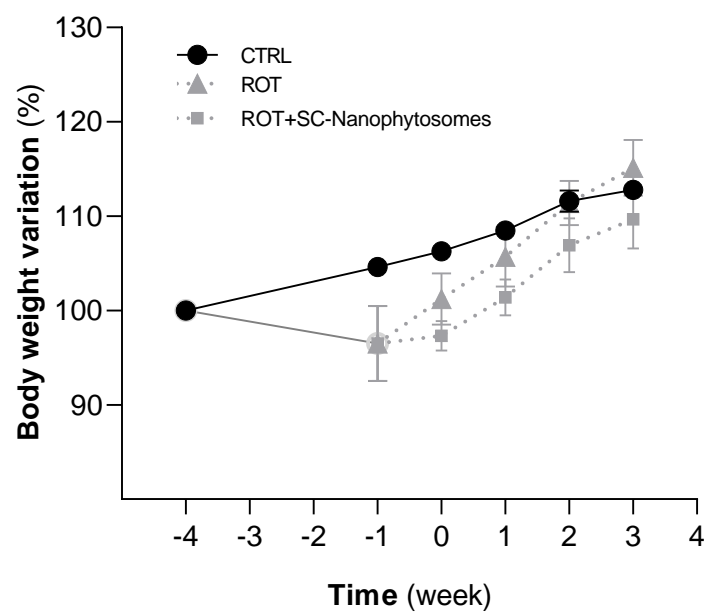

**Figure S2.** Body weight variation (%) of the rats during the experimental procedure for the CTRL, ROT and ROT+SC-Nanophytosomes groups. The animals' body weight, expressed per group by average  $\pm$ std, when the

study started was: CTRL 397.5±21.4 g and ROT 362.1±32.5 g, and at the end of the study, the average body weight was: CTRL 448.2±22.5 g, ROT 417.5±37.4 g and ROT+SC-Nanophytosomes 405.2±19.8 g.

**Table S1.** Average of the organ weights of Wistar rats from CTRL, ROT and ROT+SC-Nanophytosomes groups

| <b>Organ weights (g)</b> | <b>CTRL</b>  | <b>ROT</b>   | <b>ROT + SC-Nanophytosomes</b> |
|--------------------------|--------------|--------------|--------------------------------|
| BG-Cereb                 | 0.868±0.086  | 0.813±0.030  | 0.827±0.089                    |
| C-Cortex                 | 1.0328±0.136 | 1.101±0.120  | 1.018±0.059                    |
| Liver                    | 12.638±0.927 | 12.163±0.907 | 11.931±1.152                   |
| Kidneys                  | 2.648±0.100  | 2.615±0.283  | 2.419±0.097                    |
| Heart                    | 1.175±0.124  | 1.210±0.356  | 1.048±0.080                    |
